# Supplementary material for: TNFα-Induced Mucin 4 Expression Elicits Trastuzumab Resistance in HER2-Positive Breast Cancer
Source: Oxford University Press journal article supplement (doi:10.1158/1078-0432.ccr-16-0970), 2016-10-03
Supplement: 10780432ccr160970-sup-164551_2_supp_3676088_zdvhfz.docx [file 10780432ccr160970-sup-164551_2_supp_3676088_zdvhfz.docx]

**Supplementary Table S1.** Patient baseline characteristics.

|  | HER2-positive | | | |  | HER2-negative, ER-positive | | | |
| --- | --- | --- | --- | --- | --- | --- | --- | --- | --- |
| Characteristic | Nº patients | % | Median | Range |  | Nº patients | % | Median | Range |
| Total number of patients | 78 |  |  |  |  | 72 |  |  |  |
| Age (years) |  |  | 49 | 25-75 |  |  |  | 54 | 30-78 |
| Length follow-up (months) |  |  | 30 | 6-107 |  |  |  | 41 | 6-156 |
| Menopausal status |  |  |  |  |  |  |  |  |  |
| Pre | 44 | 57 |  |  |  | 20 | 28 |  |  |
| Post | 34 | 43 |  |  |  | 52 | 72 |  |  |
| Tumor size |  |  |  |  |  |  |  |  |  |
| T1 | 28 | 36 |  |  |  | 40 | 57 |  |  |
| T2 | 33 | 42 |  |  |  | 25 | 35 |  |  |
| T3 | 13 | 17 |  |  |  | 1 | 2 |  |  |
| T4 | 4 | 5 |  |  |  | 4 | 6 |  |  |
| Not documented |  |  |  |  |  | 2 |  |  |  |
| Lymph node status |  |  |  |  |  |  |  |  |  |
| N0 | 43 | 55 |  |  |  | 40 | 58 |  |  |
| N1 | 24 | 31 |  |  |  | 15 | 22 |  |  |
| N2 | 5 | 6 |  |  |  | 10 | 14 |  |  |
| N3 | 6 | 8 |  |  |  | 4 | 6 |  |  |
| Not documented |  |  |  |  |  | 3 |  |  |  |
| Clinical stage |  |  |  |  |  |  |  |  |  |
| I | 22 | 28 |  |  |  | 30 | 42 |  |  |
| II | 36 | 46 |  |  |  | 32 | 44 |  |  |
| III | 20 | 26 |  |  |  | 10 | 14 |  |  |
| Histological grade |  |  |  |  |  |  |  |  |  |
| 1 | 7 | 9 |  |  |  | 2 | 3 |  |  |
| 2 | 26 | 35 |  |  |  | 31 | 31 |  |  |
| 3 | 42 | 56 |  |  |  | 45 | 66 |  |  |
| Not documented | 3 |  |  |  |  | 4 |  |  |  |
| Estrogen receptor positive | 55 | 71 |  |  |  | 72 | 100 |  |  |
| Progesterone receptor positive | 47 | 60 |  |  |  | 75 | 92 |  |  |

**Supplementary Table S2.** Growth rate of TNFα-producing and control BT-474 tumors treated with trastuzumab

| Tumor | Growth rate ± SEM (mm3/day) | Mean Tumor Volume ± SEM (mm3) at day 11 | % inhibition |
| --- | --- | --- | --- |
| BT-474 C + IgG | 5.2 ± 1.6 | 134.4 ± 25.1 |  |
| BT-474 C + TZ | -6.6 ± 1.1 | 7.9 ± 3.2** | 94.1 |
| BT-474 T1 + IgG | 4.9 ± 1.1 | 91.2 ± 16.1 |  |
| BT-474 T1 + TZ | 6.1 ± 1.6 | 112.3 ± 27.3# | -23.1 |
| BT-474 T2 + IgG | 8.2 ± 2.5 | 195.1 ± 35.5 |  |
| BT-474 T2 + TZ | 5.6 ± 1.3 | 153.4 ± 11.0# | 21.4 |
|  |  |  |  |
| **, *P* <0.01 vs. BT-474 C + IgG  #, NS vs. IgG-treated | |  |  |

**Supplementary Table S3:** Inhibition of JIMT-1 and KPL-4 growth by trastuzumab and etanercept.

| Tumor | Treatment | Growth rate ± SEM (mm3/day) | Mean Tumor Volume ± SEM (mm3) # | % inhibition |
| --- | --- | --- | --- | --- |
| JIMT-1 | IgG | 6.9 ± 0.8 | 217.6 ± 40.3 |  |
|  | Tz | 6.9 ± 0.9 | 219.7 ± 38.8 |  |
|  | Eta | 6.9 ± 0.7 | 217.7 ± 37.0 |  |
|  | Tz + Eta | 2.9 ± 0.2 | 99.9 ± 10.7** | 54.1 |
|  |  |  |  |  |
| KPL-4 | IgG | 2.1 ± 0.3 | 100.7 ± 13.2 |  |
|  | Tz | 1.3 ± 0.4 | 93.5 ± 8.8 |  |
|  | Eta | 2.2 ± 0.3 | 109.8 ± 12.5 |  |
|  | Tz + Eta | -1.2 ± 0.3 | 33.2 ± 3.9*** | 67 |
|  |  |  |  |  |
| **, *P*<0.01; ***, *P*<0.001 vs IgG | | |  |  |
| # JIMT-1 tumors, at day 28th and KPL-4 tumors, at day 21st | | | |  |

**Supplementary Table S4.** Correlation between TNFand MUC4 expression

|  | **MUC4 -** | **MUC4 +** | **Total N (%)** | ***P*** |
| --- | --- | --- | --- | --- |
| **TNF -** | 6 | 2 | 8 (11) | 0.040 |
| **TNF +** | 25 | 45 | 70 (89) |  |
| **Total N (%)** | 31 (40) | 47 (60) | 78 (100) |  |

**Supplementary Table S5.** Correlation between MUC4 expression and clinocopathological characteristics.

| Clinicopathologicalcharacteristics | | MUC4  (n= 78) | | *P* |
| --- | --- | --- | --- | --- |
|  |  | Negative (N, %) | Positive (N, %) |  |
| Overall population |  | 31 (39.7) | 47 (60.3) |  |
| Menopausal status | Pre | 14 (31.8) | 30 (68.2) | 0.104 |
|  | Post | 17 (50) | 17 (50) |  |
| Tumor size | I, II | 25 (41.0) | 39 (59.0) | 0.672 |
|  | II, IV | 6 (35.3) | 11 (64.7) |  |
| Lymphnode status | 0 | 15 (35.7) | 27 (64.3) | 0.373 |
|  | 1 to 3 | 16 (45.7) | 19 (54.3) |  |
| Clinical stage | I, II | 22 (37.9) | 36 (61.9) | 0.577 |
|  | III | 9 (45) | 11 (55) |  |
| Histological grade | 1.2 | 13 (44.8) | 16 (55.2) | 0.498 |
|  | 3 | 17 (37) | 29 (63) |  |
| Estrogen receptor | Negative | 12 (52.2) | 11 (47.8) | 0.147 |
|  | Positive | 19 (34.5) | 36 (65.5) |  |
| Progesterone receptor | Negative | 14 (45.2) | 17 (54.8) | 0.427 |
|  | Positive | 17 (36.2) | 30 (63.8) |  |
