# Supplementary material for: TNFα-Induced Mucin 4 Expression Elicits Trastuzumab Resistance in HER2-Positive Breast Cancer
Source: Oxford University Press journal article supplement (doi:10.1158/1078-0432.ccr-16-0970), 2016-10-03
Supplement: 10780432ccr160970-sup-164551_2_supp_3676106_pdvhfv.doc [file 10780432ccr160970-sup-164551_2_supp_3676106_pdvhfv.doc]

**Supplementary Data**

**Materials and Methods**

***Reagents***

Trastuzumab (Herceptin®)and T-DM1 (Kadcyla®, Hoffmann-La Roche Ltd, Basel, Switzerland), etanercept (Embrel®, Wyeth, Ireland), rituximab (Rituxan®, Roche Pharma AG, Germany), human IgG (Purissimus, Buenos Aires, Argentina), TNFα (Cell Sciences, Canton, MA) were used as stated in each experiment.

***Transient transfection***

Experiments were performed with at least two different siRNA sequences.The sequences of the MUC4 siRNA that were used in the experiments shown are: (antisense strand GUGAAGUCCGAUGCUUGCGTT and sense strand CGCAAGCAUCGGACUUCACTT) (1). The above siRNA targets all splice variants of MUC4 characterized thus far. NF-kB p65 siRNA used was from Cell Signaling (SignalSilence® #6261). The non-silencing siRNA oligonucleotide was used as negative control (Dharmacon). siRNA was used at a final concentration of 100 nmol/L and was transfected with Dharmafect1 (Dharmacon) reagent according to the manufacturer’s specifications.

***Immunoblotting and antibodies***

Lysates were prepared from cells subjected to the different treatments and proteins were resolved by SDS-PAGE.Experiments were repeated three to five times. Signal intensities of phospho-proteins were analyzed by densitometry using Image J software (National Institute of Health, Bethesda, MD) and normalized to total protein bands. Experiments assessing total protein content were also repeated three to five times and signal intensities were normalized to β-tubulin bands, used as loading control.

Antibodies againstNeu/ErbB-2 (C-18), p27Kip1, MUC4 (1G8) were from Santa Cruz Biotechnology, Akt, phosphoAkt (Ser 473), IκBα, NF-κB p65 were from from Cell Signaling Technology, TNFα (#9739) was from Abcam, HER2 A0485 was from Dako (Glostrup, Denmark), β-tubulin (clone D66) was from Sigma Aldrich (St. Louis, MO) and HRP-conjugated secondary antibodies were from Vector Laboratories.

***Flow cytometry analysis***

Binding of trastuzumab was performed in cells treated with etanercept 5 μg/mL for 24h or transfected with siRNA against MUC4 for 48h. Cells were harvested with PBS + EDTA 1%, incubated with trastuzumab (0.125 μg/mL) andthen with anti-human IgG Alexa-Fluor 647 (Life Technology, Carlsbad, CA). A total of 104 cells/sample were analyzed using FACSCanto II cytometer (Becton Dickinson). Background staining was evaluated in cells incubated with an isotype control human IgG followed by anti-human Alexa-Fluor 647-conjugated antibody. Data analysis was performed using FlowJo software (Tree Star Inc., Ashland, OR). Delta mean fluorescence intensity (MFI) values were obtained by subtracting the MFI of the cells incubated with control isotype antibody from the MFI of cells incubated with trastuzumab.

***Patients***

Pre-treatment patient staging was classified according to the American Joint Committee on Cancer (AJCC) system through the Elston and Ellis histological grading system. For assessing TNFα and MUC4 scores, tissue microarrays (TMAs) were constructed with 155 primary invasive breast cancer samples from Henry Moore Institute of Oncology as we previously described (2)

***Quantification of TNFα and MUC4 by IHC***

A score of 0 to 3+ was used as previously reported by Workman et al. (3). Score: 0, no stain to less than 30% of cells staining faintly; 1+, greater than 30% of cells staining light to moderate; 2+, greater than 50% of cells staining moderately; 3+, intense staining of majority of the epithelial population. Immunostainings were run with known positive and negative tissue controls. Expression and localization of both proteins were independently evaluated by two pathologists, GI and IF, who were masked to clinical data and treatment outcome. Score discrepancies were re-evaluated and reconciled on a two-headed microscope. Tumors were considered TNFα or MUC4-positive when they exhibited a score of 2+ or 3+.

***HER2, ER and PR determination by IHC***

HER2 was stained with the polyclonal antibody A0485 and was scored according to the American Society of Clinical Oncology/College of American Pathologists guidelines (ASCO/CAP). Tumors were considered HER2-positive when exhibited a score of 3+ by IHC or score 2+ and confirmed HER2 amplification by FISH (PathVysion™, Vysis Inc., Downers Grove, IL). The immunohistochemical assessment of estrogen and progesterone receptor were made using the 6F11 (Novocastra Laboratories, U.K) and 1A6h PRa2+hPRa3 (NeoMarkers, Freemont, CA) antibodies, respectively, and were scored as described previously (2).

**References**

1. Nagy P, Friedlander E, Tanner M, Kapanen AI, Carraway KL, Isola J, et al. Decreased accessibility and lack of activation of ErbB2 in JIMT-1, a herceptin-resistant, MUC4-expressing breast cancer cell line. Cancer Res 2005;*65*:473-482.

2. Schillaci R, Guzman P, Cayrol F, Beguelin W, Diaz Flaque MC, Proietti CJ, et al. Clinical relevance of ErbB-2/HER2 nuclear expression in breast cancer. BMC Cancer 2012;*12*:74.

3. Workman HC, Miller JK, Ingalla EQ, Kaur RP, Yamamoto DI, Beckett LA, et al. The membrane mucin MUC4 is elevated in breast tumor lymph node metastases relative to matched primary tumors and confers aggressive properties to breast cancer cells. Breast Cancer Res 2009;*11*:R70.
